# Supplementary material for: The E2F Pathway Score as a Predictive Biomarker of Response to Neoadjuvant Therapy in ER+/HER2− Breast Cancer
Source: MDPI journal article supplement (doi:10.3390/cells9071643), 2020-07-08
Supplement: s1 [file s1]

**Table S1.** Overlaps of member genes of the E2F and other pathway gene sets.

| Gene Set Name             | Total Genes | Genes in Overlap |
|---------------------------|-------------|------------------|
| E2F_TARGETS               | 200         | 200              |
| G2M_CHECKPOINT            | 200         | 73 (36.5%)       |
| MYC_TARGETS_V2            | 58          | 12 (20.7%)       |
| MYC_TARGETS_V1            | 200         | 35 (17.5%)       |
| DNA_REPAIR                | 150         | 15 (10%)         |
| MITOTIC_SPINDLE           | 199         | 19 (9.5%)        |
| MTORC1_SIGNALING          | 200         | 14 (7.0%)        |
| UNFOLDED_PROTEIN_RESPONSE | 200         | 6 (3.0%)         |

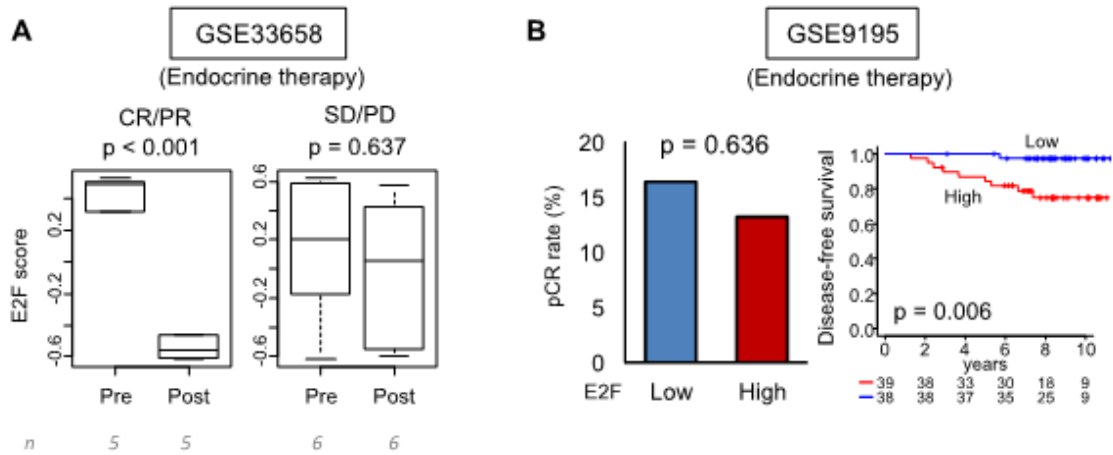

**Figure S1.** Association between the E2F pathway score and response to endocrine therapy. **(A)** Boxplots depict tumor E2F scores before (*pre*) and after (*post*) treatment for patients of the GSE33658 cohort who had complete or partial response (CR/PR:  $n = 10$ ), or steady or progressive disease (SD/PD;  $n = 12$ ) following treatment as per RECIST criteria. Tukey type boxplots demonstrate median and inter-quartile level values, and p values are calculated by ANOVA test. Group sizes ( $n$ ) are noted underneath. **(B)** Patients of the GSE9195 cohort ( $n = 77$ ) with high or low pre-treatment tumor E2F scores are compared for achievement of pathological complete response (pCR) to treatment and disease-free survival. The median value of the E2F core is used to classify patients into high and low groups. Rate of pCR and Kaplan-Meier survival curves are respectively compared with Fisher exact and logrank tests.

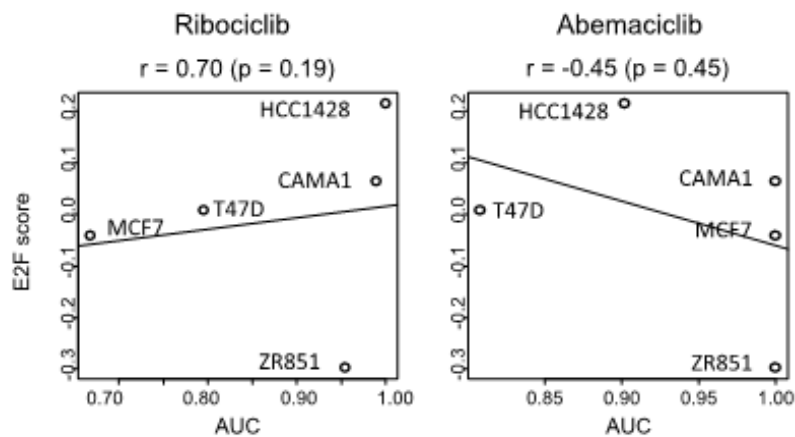

**Figure S2.** Association in human breast cancer cell-lines between E2F pathway score and sensitivity to cyclin-dependent kinase inhibitors. Sensitivity to inhibitors ribociclib or ber-naciclib, measured in area under curve (*AUC*) units in drug sensitivity assays, is plot-ted against E2F score for five cell-lines. Spearman correlation statistics are depicted.
